# Supplementary material
Source: PubMed Central journal article supplement (PMC6014712)
Supplement: EHP2192.s001.acco.pdf [file EHP2192.s001.acco.pdf]

**Note to readers with disabilities:** *EHP* strives to ensure that all journal content is accessible to all readers. However, some figures and Supplemental Material published in *EHP* articles may not conform to [508 standards](#) due to the complexity of the information being presented. If you need assistance accessing journal content, please contact [ehp508@niehs.nih.gov](mailto:ehp508@niehs.nih.gov). Our staff will work with you to assess and meet your accessibility needs within 3 working days.

### **Supplemental Material**

#### **Cadmium-Associated Differential Methylation throughout the Placental Genome: Epigenome-Wide Association Study of Two U.S. Birth Cohorts**

Todd M. Everson, Tracy Punshon, Brian P. Jackson, Ke Hao, Luca Lambertini, Jia Chen, Margaret R. Karagas, and Carmen J. Marsit

#### **Table of Contents**

**Figure S1.** Distributions of placental cadmium concentrations in the NHBCS and RICHHS.

**Figure S2.** Comparison of CpGs, GO-term and KEGG-pathway enrichment among the 10,000 CpGs that were most variable across the estimated putative cell-types (PCTs) between the NHBCS (left) and RICHHS (right).

**Figure S3.** Comparison of the percent change in meta-analyses effect sizes after PCT adjustment - loess curve was fit with the PCT-adjusted effects regressed on the non-PCT adjusted effects (red line), and a linear model represent no change in effect (black line, intercept = 0, slope = 1) the loess curve gravitating towards zero on the y-axis demonstrates overall attenuation of effects after PCT adjustment.

**Figure S4.** Comparison of the p-values from meta-analyses before and after PCT adjustment - a loess curve with the PCT-adjusted p-values regressed on the non-PCT adjusted p-values (red line), and a linear model represent no change in effect (black line, intercept = 0, slope = 1); the loess curve gravitating towards zero on the y-axis demonstrates overall decrease in small p-values after PCT adjustment.

**Figure S5.** Linear models demonstrating associations and confidence intervals for the relationships between DNAM beta-values and gene-expression at FDR-significant eQTMs.

**Figure S6.** Comparison of the percent change in meta-analyses (all probes) effect sizes after excluding mothers that reported smoking during pregnancy - loess curve (red line) does not appreciably differ from a linear model representing no change in effect (black line, intercept = 0, slope = 1).

**Figure S7.** Comparison of the percent change in meta-analyses (only probes with nominally-significant associations in original analyses) effect sizes after excluding mothers that reported smoking during pregnancy – loess curve (red line) does not appreciably differ from a linear model representing no change in effect (black line, intercept = 0, slope = 1).

**Table S1.** Effect estimates at top 17 hits utilizing log-Cd as the independent variables. Ch. = Chromosome, Pos = genomic location (hg19), Reg. = Annotated Regulatory Features, TSS = Transcription Start Site, UTR = untranslated region. All models adjusted for infant sex, maternal smoking during pregnancy, highest achieved maternal education level, and PCT estimates.

**Table S2.** Comparison of effect estimates at top 17 hits before (Original  $\beta_1$ ) and after excluding mothers that reported smoking during pregnancy (SA  $\beta_1$ ). Ch = Chromosome, Pos = genomic location (hg19), SA = Sensitivity Analysis,  $\% \Delta = (((\text{Original } \beta_1 - \text{SA } \beta_1)/(\text{Original } \beta_1)) * 100$ . All models adjusted for infant sex, maternal smoking during pregnancy, highest achieved maternal education level, and PCT estimates.

**Table S3.** P-values from Wilcox-tests to examine whether variations in estimated putative cell type (PCT) proportions were associated with maternal smoking during pregnancy in each cohort.

**Table S4.** P-values from Wilcox-tests to examine whether variations in gene-expression at our top genes were associated with maternal smoking during pregnancy in the RICHS sample.

**Additional File** – Excel Document

**Figure S1.** Distributions of placental cadmium concentrations in the NHBCS and RICHs.

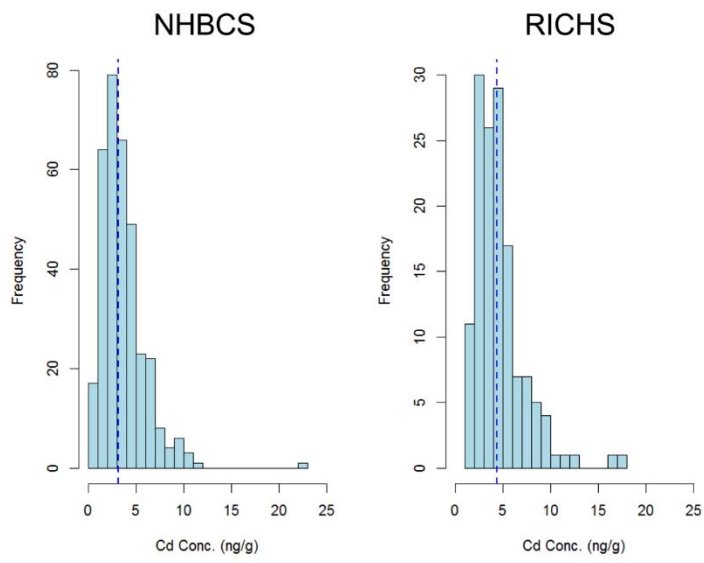

**Figure S2.** Comparison of CpGs, GO-term and KEGG-pathway enrichment among the 10,000 CpGs that were most variable across the estimated putative cell-types (PCTs) between the NHBCS (left) and RICHs (right).

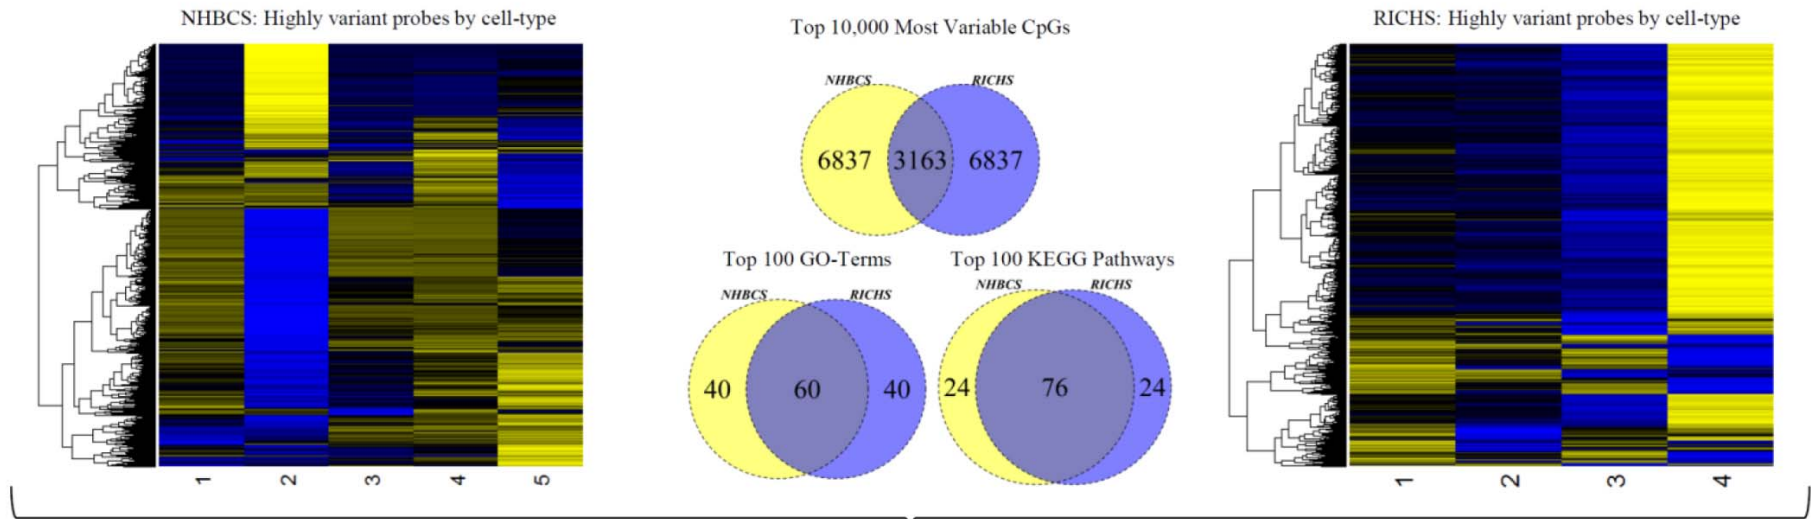

| Top 10 KEGG Pathways from NHBCS         | N    | NHBCS |          | RICHs |          |
|-----------------------------------------|------|-------|----------|-------|----------|
|                                         |      | DE    | P-value  | DE    | P-Value  |
| Metabolic pathways                      | 1191 | 181   | 8.61E-61 | 102   | 1.61E-24 |
| Neuroactive ligand-receptor interaction | 257  | 66    | 3.46E-35 | 68    | 2.96E-45 |
| Axon guidance                           | 168  | 58    | 6.33E-30 | 36    | 3.03E-17 |
| Calcium signaling pathway               | 172  | 51    | 5.58E-26 | 36    | 1.15E-18 |
| Pathways in cancer                      | 384  | 75    | 8.03E-25 | 48    | 3.82E-15 |
| Rap1 signaling pathway                  | 206  | 53    | 1.62E-23 | 30    | 1.32E-11 |
| Olfactory transduction                  | 348  | 51    | 4.39E-23 | 110   | 1.80E-78 |
| Cell adhesion molecules (CAMs)          | 133  | 40    | 1.68E-22 | 35    | 2.53E-22 |
| cAMP signaling pathway                  | 192  | 48    | 4.58E-22 | 39    | 2.91E-20 |
| PI3K-Akt signaling pathway              | 318  | 61    | 5.01E-21 | 45    | 1.39E-16 |

| Top 10 KEGG Pathways from RICHs         | N    | NHBCS |          | RICHs |          |
|-----------------------------------------|------|-------|----------|-------|----------|
|                                         |      | DE    | P-value  | DE    | P-Value  |
| Olfactory transduction                  | 348  | 51    | 4.39E-23 | 110   | 1.80E-78 |
| Neuroactive ligand-receptor interaction | 257  | 66    | 3.46E-35 | 68    | 2.96E-45 |
| Metabolic pathways                      | 1191 | 181   | 8.61E-61 | 102   | 1.61E-24 |
| Cell adhesion molecules (CAMs)          | 133  | 40    | 1.68E-22 | 35    | 2.53E-22 |
| cAMP signaling pathway                  | 192  | 48    | 4.58E-22 | 39    | 2.91E-20 |
| Glutamatergic synapse                   | 113  | 33    | 4.89E-16 | 32    | 8.61E-20 |
| Calcium signaling pathway               | 172  | 51    | 5.58E-26 | 36    | 1.15E-18 |
| Morphine addiction                      | 88   | 34    | 3.01E-20 | 28    | 1.18E-18 |
| Axon guidance                           | 168  | 58    | 6.33E-30 | 36    | 3.03E-17 |
| Nicotine addiction                      | 36   | 14    | 1.24E-09 | 18    | 4.12E-17 |

**Figure S3.** Comparison of the percent change in meta-analyses effect sizes after PCT adjustment - loess curve was fit with the PCT-adjusted effects regressed on the non-PCT adjusted effects (red line), and a linear model represent no change in effect (black line, intercept = 0, slope = 1) the loess curve gravitating towards zero on the y-axis demonstrates overall attenuation of effects after PCT adjustment.

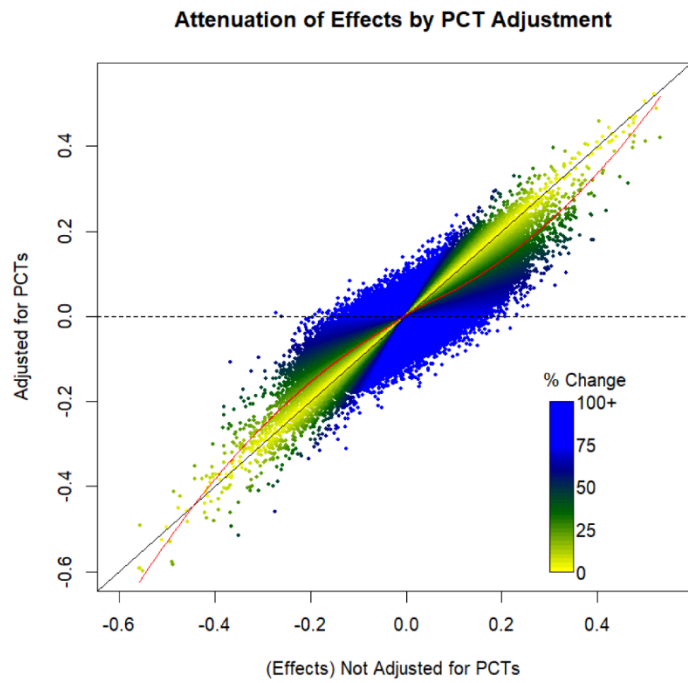

**Figure S4.** Comparison of the p-values from meta-analyses before and after PCT adjustment - a loess curve with the PCT-adjusted p-values regressed on the non-PCT adjusted p-values (red line), and a linear model represent no change in effect (black line, intercept = 0, slope = 1); the loess curve gravitating towards zero on the y-axis demonstrates overall decrease in small p-values after PCT adjustment.

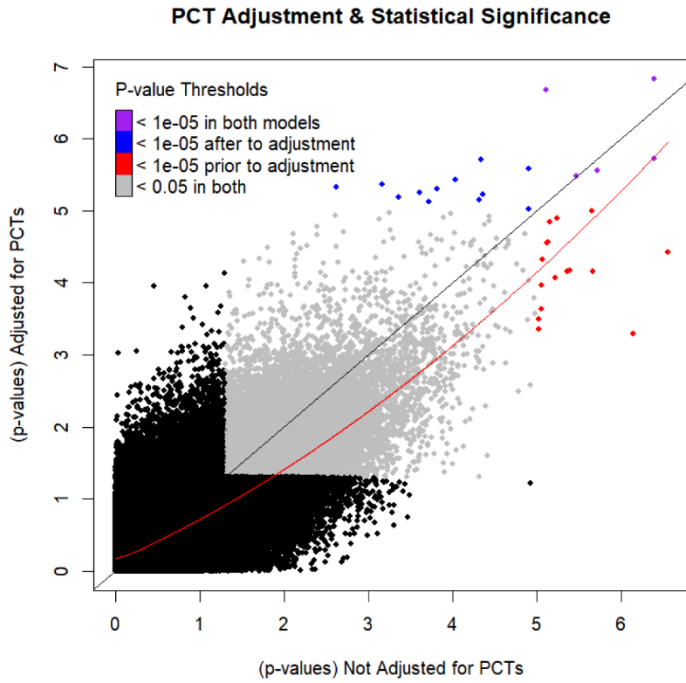

**Figure S5.** Linear models demonstrating associations and confidence intervals for the relationships between DNAM beta-values and gene-expression at FDR-significant eQTM.

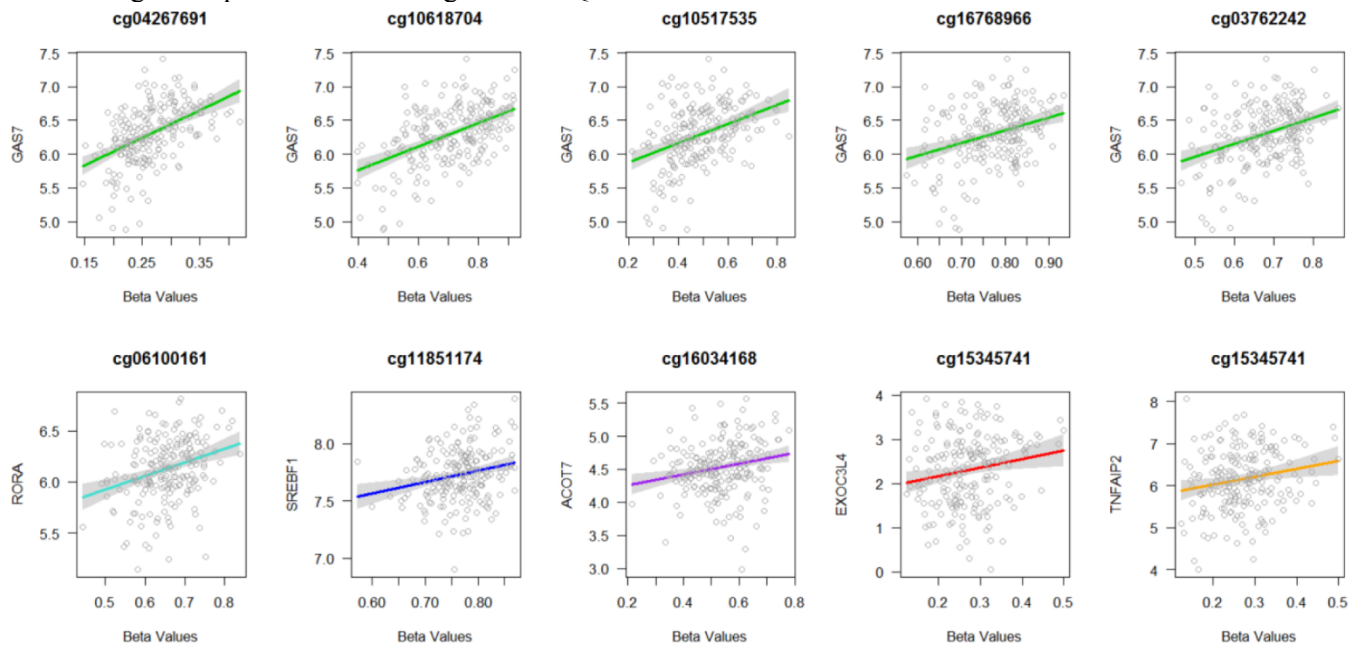

**Figure S6.** Comparison of the percent change in meta-analyses (all probes) effect sizes after excluding mothers that reported smoking during pregnancy – loess curve (red line) does not appreciably differ from a linear model representing no change in effect (black line, intercept = 0, slope = 1).

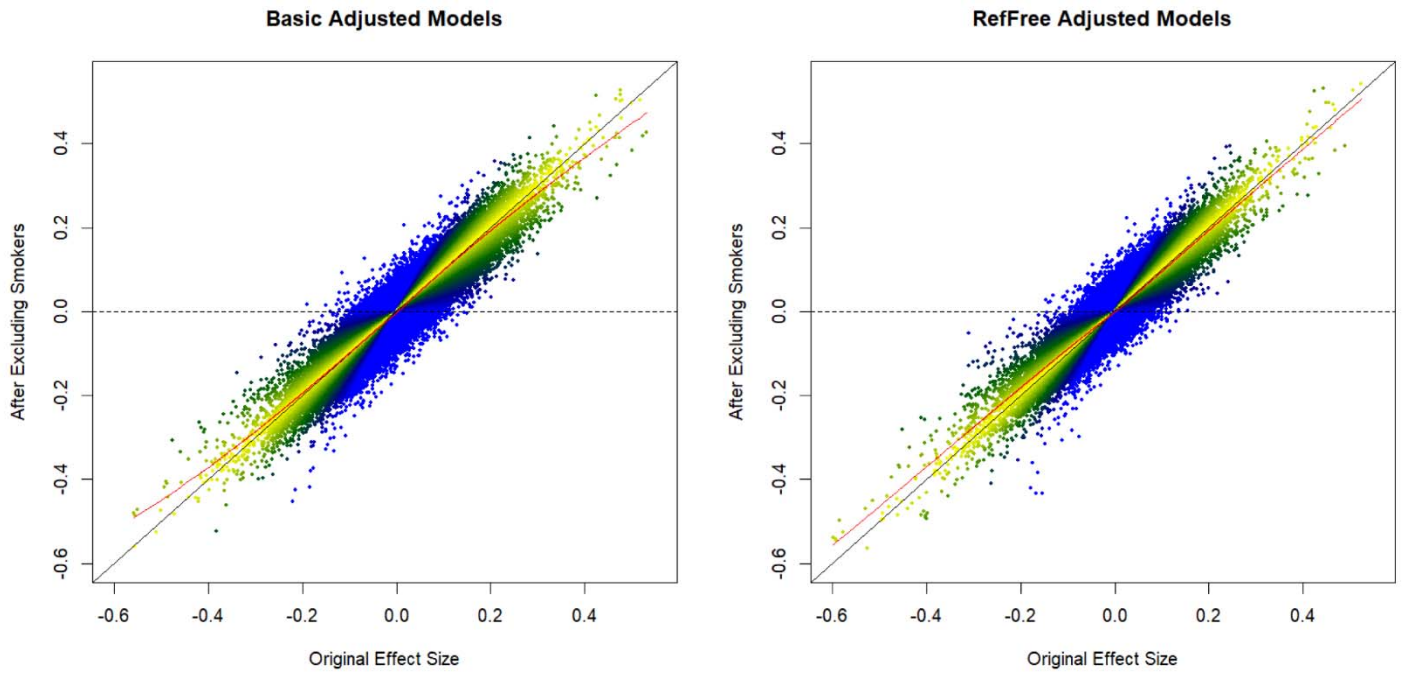



**Figure S7.** Comparison of the percent change in meta-analyses (only probes with nominally-significant associations in original analyses) effect sizes after excluding mothers that reported smoking during pregnancy – loess curve (red line) does not appreciably differ from a linear model representing no change in effect (black line, intercept = 0, slope = 1).

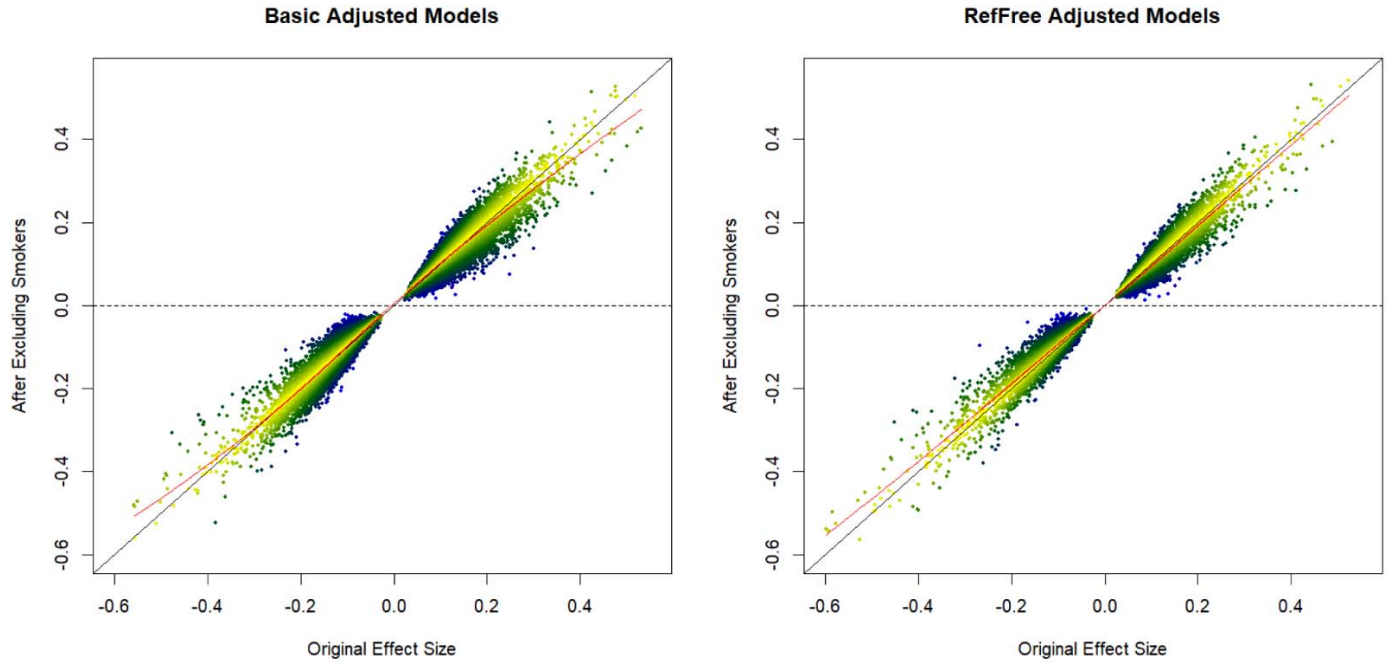

**Table S1.** Effect estimates at top 17 hits utilizing log-Cd as the independent variables. Ch. = Chromosome, Pos = genomic location (hg19), Reg. = Annotated Regulatory Features, TSS = Transcription Start Site, UTR = untranslated region. All models adjusted for infant sex, maternal smoking during pregnancy, highest achieved maternal education level, and PCT estimates.

| CpG Annotations |     |           |                |                    | Meta-Analysis |           | NHBCS (N=343) |             | RICHS (N=141) |             |
|-----------------|-----|-----------|----------------|--------------------|---------------|-----------|---------------|-------------|---------------|-------------|
| CpG ID          | Ch. | Pos       | Gene           | Reg.               | $\beta_1$     | p-value   | $\beta_1$     | p-value     | $\beta_1$     | p-value     |
| cg16034168      | 1   | 6336711   | <i>ACOT7</i>   | Body               | 0.1075        | 0.001779  | 0.105389915   | 0.007185106 | 0.114803274   | 0.110169937 |
| cg24000528      | 2   | 177013630 | <i>MIR10B</i>  | TSS1500            | 0.0714        | 0.0009701 | 0.080765065   | 0.009374949 | 0.062549423   | 0.037871092 |
| cg24696183      | 11  | 2891360   | <i>KCNQ1DN</i> | Body               | -0.0838       | 9.98E-05  | -0.073234174  | 0.020318023 | -0.092991316  | 0.001595027 |
| cg23193177      | 11  | 45717613  | -              | -                  | 0.1048        | 0.0001008 | 0.100391023   | 0.00164609  | 0.11570351    | 0.021565814 |
| cg15345741      | 14  | 103674333 | -              | -                  | 0.0899        | 0.0005673 | 0.092375843   | 0.002475107 | 0.083328327   | 0.097561653 |
| cg06100161      | 15  | 60987894  | <i>RORA</i>    | Body               | 0.1007        | 1.87E-05  | 0.049991211   | 0.109698174 | 0.167084844   | 2.96E-06    |
| cg03917020      | 16  | 85285139  | -              | -                  | 0.0439        | 0.00181   | 0.033530654   | 0.032256057 | 0.087958584   | 0.006315225 |
| cg02600679      | 16  | 88832700  | <i>FAM38A</i>  | Body               | 0.1068        | 0.0003185 | 0.084005173   | 0.018686187 | 0.157291436   | 0.003121685 |
| cg04267691      | 17  | 9862752   | <i>GAS7</i>    | Body;5'UTR;1stExon | 0.0588        | 0.006968  | 0.03359771    | 0.217987695 | 0.103342572   | 0.004360351 |
| cg10517535      | 17  | 9929698   | <i>GAS7</i>    | Body;TSS200        | 0.0881        | 0.007682  | 0.023996167   | 0.512378622 | 0.369329885   | 1.47E-06    |
| cg03762242      | 17  | 9940004   | <i>GAS7</i>    | Body;1stExon;5'UTR | 0.1033        | 5.19E-05  | 0.05464858    | 0.104782368 | 0.168909222   | 1.57E-05    |
| cg16768966      | 17  | 9940227   | <i>GAS7</i>    | Body;TSS200        | 0.1097        | 0.001365  | 0.045394174   | 0.273538299 | 0.247800353   | 4.56E-05    |
| cg10618704      | 17  | 9940970   | <i>GAS7</i>    | TSS1500;Body       | 0.1079        | 0.006731  | 0.03869942    | 0.394452734 | 0.336065153   | 4.67E-05    |
| cg11851174      | 17  | 17712609  | <i>RAI1</i>    | Body               | 0.0795        | 0.001596  | 0.077067438   | 0.007385044 | 0.08769538    | 0.093126582 |
| cg19944656      | 17  | 76876040  | <i>TIMP2</i>   | Body               | 0.0642        | 0.005459  | 0.054293055   | 0.072429574 | 0.078115568   | 0.029265054 |
| cg11707084      | 19  | 48345263  | <i>CRX</i>     | 3'UTR              | 0.0916        | 8.81E-05  | 0.100161672   | 0.000183187 | 0.06428528    | 0.178764902 |
| cg03566291      | 21  | 44831040  | -              | -                  | 0.0833        | 0.01375   | 0.040312345   | 0.284500444 | 0.261089902   | 0.000655329 |

**Table S2.** Comparison of effect estimates at top 17 hits before (Original  $\beta_1$ ) and after excluding mothers that reported smoking during pregnancy (SA  $\beta_1$ ). Ch = Chromosome, Pos = genomic location (hg19), SA = Sensitivity Analysis, %  $\Delta$  =  $((\text{Original } \beta_1 - \text{SA } \beta_1)/(\text{Original } \beta_1)) * 100$ . All models adjusted for infant sex, maternal smoking during pregnancy, highest achieved maternal education level, and PCT estimates.

| CpG Annotations |    |           | Meta Analysis      |              |            |                  |            | NHBCS              |              |            |                  |            | RICHs              |              |            |                  |            |
|-----------------|----|-----------|--------------------|--------------|------------|------------------|------------|--------------------|--------------|------------|------------------|------------|--------------------|--------------|------------|------------------|------------|
| CpG ID          | Ch | Pos       | Original $\beta_1$ | SA $\beta_1$ | % $\Delta$ | Original p-value | SA p-value | Original $\beta_1$ | SA $\beta_1$ | % $\Delta$ | Original p-value | SA p-value | Original $\beta_1$ | SA $\beta_1$ | % $\Delta$ | Original p-value | SA p-value |
| cg16034168      | 1  | 6336711   | 0.3197             | 0.3076       | 3.78       | 2.80E-06         | 7.50E-06   | 0.3202             | 0.3196       | 0.17       | 3.11E-04         | 2.95E-04   | 0.3191             | 0.2892       | 9.35       | 8.13E-03         | 2.78E-03   |
| cg24000528      | 2  | 177013630 | 0.1648             | 0.1657       | -0.55      | 7.59E-06         | 4.45E-05   | 0.1778             | 0.2002       | -12.60     | 1.52E-03         | 5.78E-04   | 0.1550             | 0.1330       | 14.20      | 1.89E-02         | 1.50E-03   |
| cg24696183      | 11 | 2891360   | -0.1620            | -0.1563      | 3.52       | 4.31E-06         | 3.70E-05   | -0.1965            | -0.2013      | -2.48      | 5.67E-04         | 4.89E-04   | -0.1407            | -0.1222      | 13.12      | 1.49E-02         | 1.71E-03   |
| cg23193177      | 11 | 45717613  | 0.2402             | 0.2138       | 10.99      | 4.68E-06         | 1.18E-04   | 0.2244             | 0.2316       | -3.23      | 4.94E-04         | 5.13E-04   | 0.2712             | 0.1733       | 36.10      | 8.39E-02         | 2.70E-03   |
| cg15345741      | 14 | 103674333 | 0.2455             | 0.1955       | 20.37      | 1.49E-07         | 5.56E-05   | 0.2533             | 0.1899       | 25.02      | 9.69E-05         | 3.46E-03   | 0.2372             | 0.2025       | 14.60      | 5.48E-03         | 4.22E-04   |
| cg06100161      | 15 | 60987894  | 0.2042             | 0.1656       | 18.90      | 1.97E-06         | 3.07E-04   | 0.1178             | 0.1028       | 12.74      | 6.28E-02         | 1.27E-01   | 0.2776             | 0.2198       | 20.82      | 4.49E-04         | 1.99E-06   |
| cg03917020      | 16 | 85285139  | 0.1358             | 0.1385       | -1.99      | 5.52E-06         | 5.95E-06   | 0.1348             | 0.1335       | 1.00       | 3.62E-04         | 6.03E-04   | 0.1375             | 0.1465       | -6.56      | 3.04E-03         | 4.85E-03   |
| cg02600679      | 16 | 88832700  | 0.2547             | 0.2379       | 6.60       | 4.92E-06         | 4.38E-05   | 0.1731             | 0.1716       | 0.87       | 2.55E-02         | 2.94E-02   | 0.3420             | 0.3176       | 7.13       | 2.37E-04         | 2.02E-05   |
| cg04267691      | 17 | 9862752   | 0.1773             | 0.1201       | 32.26      | 6.98E-06         | 3.00E-03   | 0.1198             | 0.0777       | 35.10      | 3.09E-02         | 1.60E-01   | 0.2360             | 0.1688       | 28.48      | 4.45E-03         | 2.57E-05   |
| cg10517535      | 17 | 9929698   | 0.3120             | 0.2380       | 23.72      | 6.46E-06         | 1.90E-03   | 0.1564             | 0.1318       | 15.72      | 6.97E-02         | 1.44E-01   | 0.5930             | 0.5129       | 13.51      | 4.10E-04         | 3.08E-07   |
| cg03762242      | 17 | 9940004   | 0.2302             | 0.2073       | 9.95       | 3.33E-06         | 8.55E-05   | 0.2044             | 0.1836       | 10.18      | 2.08E-03         | 6.12E-03   | 0.2627             | 0.2463       | 6.23       | 4.08E-03         | 4.12E-04   |
| cg16768966      | 17 | 9940227   | 0.3131             | 0.2725       | 12.97      | 1.92E-06         | 1.34E-04   | 0.2345             | 0.1953       | 16.72      | 7.31E-03         | 3.19E-02   | 0.4156             | 0.3957       | 4.80       | 5.75E-04         | 3.12E-05   |
| cg10618704      | 17 | 9940970   | 0.3593             | 0.3191       | 11.19      | 5.91E-06         | 1.87E-04   | 0.2385             | 0.2150       | 9.85       | 2.03E-02         | 4.17E-02   | 0.5373             | 0.5160       | 3.96       | 3.81E-04         | 1.65E-05   |
| cg11851174      | 17 | 17712609  | 0.1900             | 0.1754       | 7.68       | 3.69E-06         | 3.85E-05   | 0.1961             | 0.1984       | -1.19      | 1.07E-04         | 1.12E-04   | 0.1783             | 0.1247       | 30.07      | 1.02E-01         | 1.10E-02   |
| cg19944656      | 17 | 76876040  | 0.1762             | 0.1666       | 5.45       | 2.62E-06         | 2.50E-05   | 0.1726             | 0.1659       | 3.88       | 8.06E-04         | 1.72E-03   | 0.1803             | 0.1675       | 7.08       | 4.84E-03         | 9.82E-04   |
| cg11707084      | 19 | 48345263  | 0.2230             | 0.2342       | -5.02      | 2.09E-07         | 7.99E-08   | 0.2269             | 0.2410       | -6.21      | 3.10E-05         | 9.61E-06   | 0.2164             | 0.2220       | -2.60      | 2.34E-03         | 1.93E-03   |
| cg03566291      | 21 | 44831040  | 0.2335             | 0.2073       | 11.22      | 9.46E-06         | 1.89E-04   | 0.2085             | 0.2126       | -2.00      | 9.57E-04         | 1.07E-03   | 0.2913             | 0.1928       | 33.82      | 7.14E-02         | 2.38E-03   |

**Table S3.** P-values from Wilcoxon-tests to examine whether variations in estimated putative cell type (PCT) proportions were associated with maternal smoking during pregnancy in each cohort.

| <b>T-test p-values</b> | <b>PCT-1</b> | <b>PCT-2</b> | <b>PCT-3</b> | <b>PCT-4</b> | <b>PCT-5</b> |
|------------------------|--------------|--------------|--------------|--------------|--------------|
| NHBCS                  | 0.09         | 0.24         | 0.24         | 0.39         | 0.69         |
| RICHs                  | 0.29         | 0.42         | 0.7          | 0.86         | NA           |

**Table S4.** P-values from Wilcox-tests to examine whether variations in gene-expression at our top genes were associated with maternal smoking during pregnancy in the RICHS sample.

| T-test p-values | <i>TNFAIP2</i> | <i>EXOC3L4</i> | <i>GAS7</i> | <i>RORA</i> | <i>ACOT7</i> | <i>SREBF1</i> |
|-----------------|----------------|----------------|-------------|-------------|--------------|---------------|
| RICHS           | 0.68           | 0.5            | 0.26        | 0.28        | 0.07         | 0.78          |

## **Additional File – Excel Document**

**Excel Table S1.** GO-term enrichment for the 10,000 CpG sites with greatest variation in putative cell type specific DNA methylation levels. Enrichment was performed within each cohort, then top GO-terms by ranked enrichment p-value were compared. N = number of genes represented by a GO term, DE = number of genes from that GO term that were included in our top 10,000 CpGs, FDR = FDR-adjusted p-value for enrichment, Rank = cohort-specific rank for GO-term enrichment.

**Excel Table S2.** KEGG-pathway enrichment for the 10,000 CpG sites with greatest variation in putative cell type specific DNA methylation levels. Enrichment was performed within each cohort, then top KEGG-pathway by ranked enrichment p-value were compared. N = number of genes represented by a KEGG-pathway, DE = number of genes from that KEGG-pathway that were included in our top 10,000 CpGs, FDR = FDR-adjusted p-value for enrichment, Rank = cohort-specific rank for KEGG-pathway enrichment.

**Excel Table S3.** Results from cohort-specific and meta-analyses of Cd-associated DNA methylation; adjusted for maternal smoking during pregnancy, maternal education and fetal sex.

**Excel Table S4.** Results from cohort-specific and meta-analyses of Cd-associated DNA methylation; adjusted for maternal smoking during pregnancy, maternal education, fetal sex and estimated tissue heterogeneity.

**Excel Table S5.** GO Term with a nominal enrichment p-value  $< 0.05$ , among the top 250 CpGs from the PCT adjusted meta-analyses.

**Excel Table S6.** KEGG Pathways with a nominal enrichment p-value  $< 0.05$ , among the top 250 CpGs from the PCT adjusted meta-analyses.

**Excel Table S7.** Modeling results for Cd-Sex interactions at CpGs with meta-analysis p-values  $< 1e-05$ ; adjusted for maternal smoking during pregnancy and maternal education.
